# Supplementary material for: Profiling of Antimicrobial Metabolites Synthesized by the Endophytic and Genetically Amenable Biocontrol Strain Bacillus velezensis DMW1
Source: PubMed Central journal article supplement (PMC10100683; doi:10.1128/spectrum.00038-23), 2023-02-21
Supplement: spectrum.00038-23-s0001.pdf [file spectrum.00038-23-s0001.pdf]

Supplementary material

**Profiling of antimicrobial metabolites synthesized by the endophytic  
and genetically amenable biocontrol strain, *Bacillus velezensis* DMW1**

**Chenjie Yu <sup>a</sup>, Han Chen <sup>a</sup>, Linli zhu <sup>a</sup>, Yan Song <sup>a</sup>, Qifan Jiang <sup>a</sup>, Yaming Zhang  
<sup>a</sup>, Qurban Ali <sup>a</sup>, Qin Gu <sup>a</sup>, Xuewen Gao <sup>a</sup>, Rainer Borriss <sup>b</sup>, Suomeng Dong<sup>a</sup>,  
Huijun Wu <sup>a\*</sup>**

<sup>a</sup> Department of Plant Pathology, College of Plant Protection, Nanjing Agricultural University, Key Laboratory of Integrated Management of Crop Diseases and Pests, Ministry of Education, Nanjing, China

<sup>b</sup> Humboldt University Berlin, Institut für Biologie, 10115 Berlin; Germany

\* Correspondence author

Chenjie Yu and Han Chen contributed equally to this work. Author order was determined both alphabetically and in order of increasing seniority.

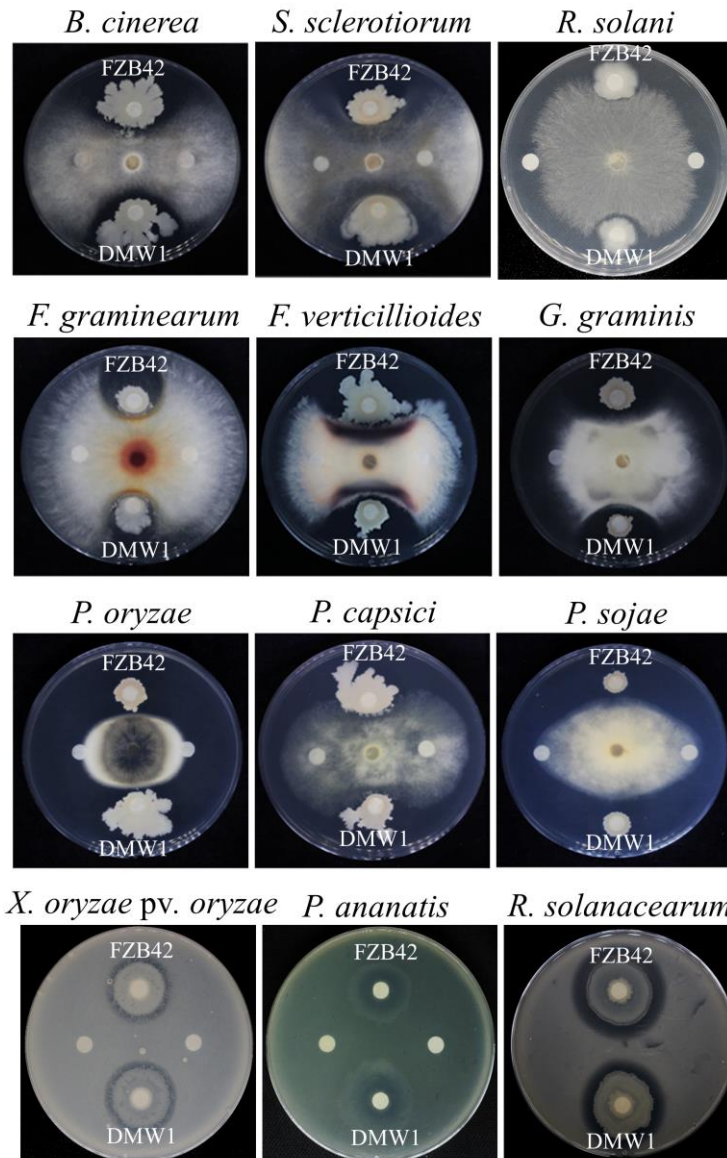

FIG S1 Inhibition effect of *B. velezensis* DMW1 and FZB42 against fungi (*B. cinerea*, *S. sclerotiorum*, *R. solani*, *F. graminearum*, *F. verticillioides*, *G. graminis*, *P. oryzae*), oomycetes (*P. capsici*, *P. sojae*), and bacteria (*X. oryzae* pv. *oryzae*, *P. ananatis*, *R. solanacearum*). The diameter of inhibition zone was recorded, and the inhibition rate was calculated.

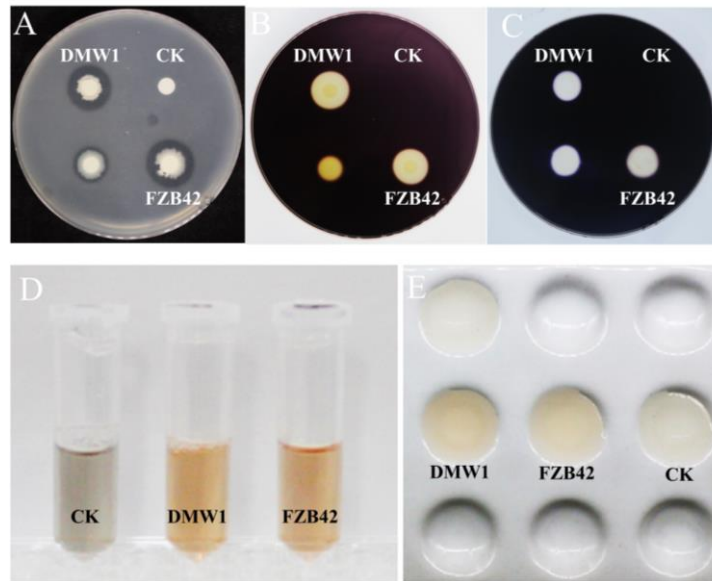

FIG S2 The detection of protease (A), cellulase (B) and amylase (C) activity, as well as siderophore (D) and IAA (E) production of *B. velezensis* DMW1 and FZB42. CK, liquid LB medium was set as the control. The clear halo zones represented the production of extracellular enzymes by DMW1 and FZB42. The changed color compared with CK represented the production of siderophore and IAA.

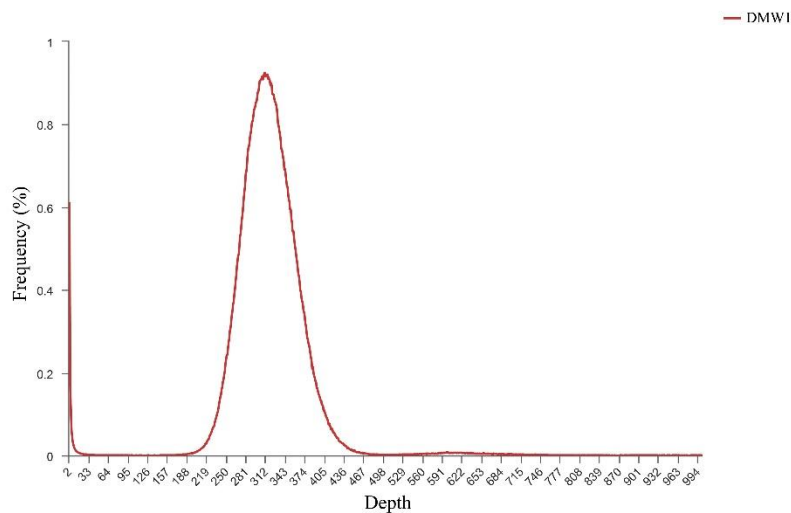

FIG S3 K-mer analysis of *B. velezensis* DMW1. X-coordinate represented depth and Y-coordinate represented proportion.

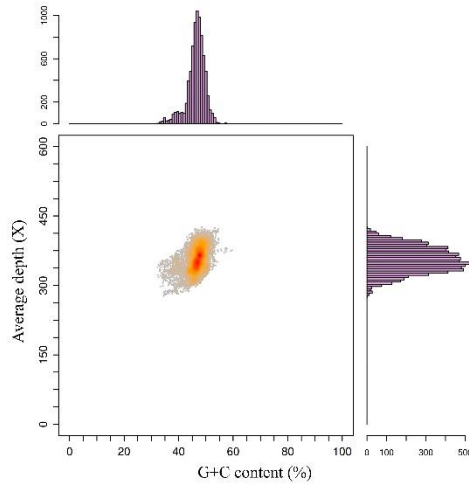

Fig S4 GC-depth analysis of *B.velezensis* DMW1. X-coordinate represented G+C content and Y-coordinate represented average depth.

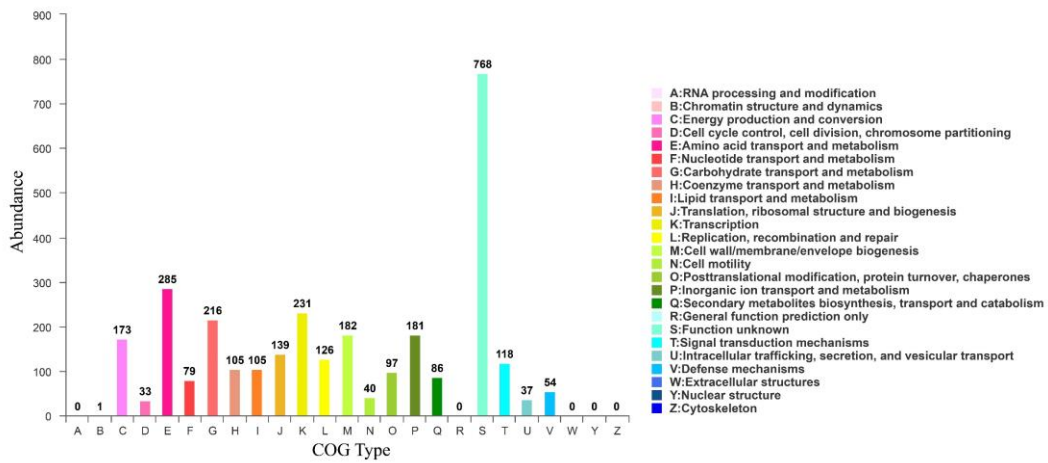

FIG S5 COG annotation of *B.velezensis* DMW1. Digital above each columns meant the number of genes divided to corresponding categories.

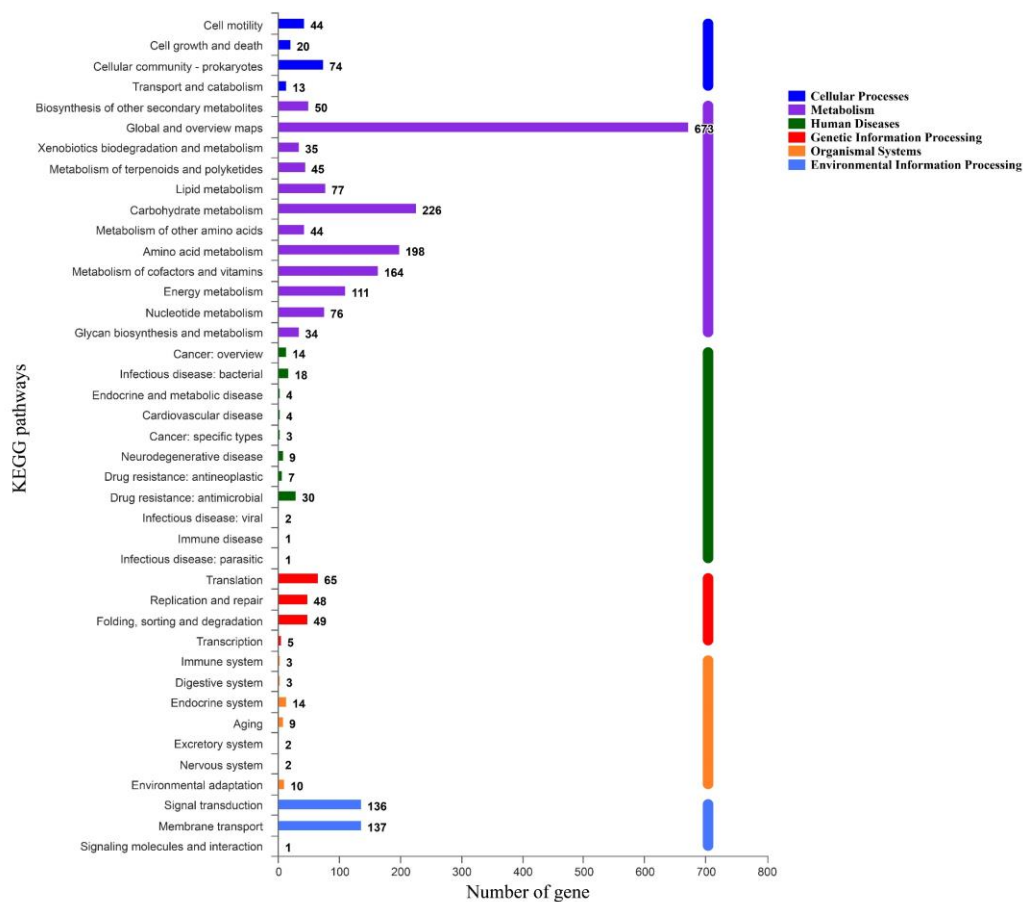

FIG S6 KEGG annotation of *B. velezensis* DMW1. Different colors represented the classification of the KEGG pathway.

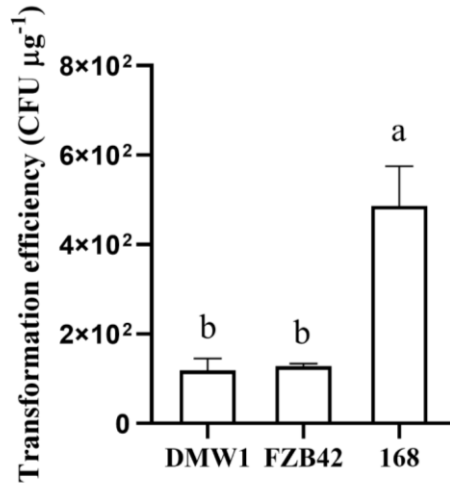

FIG S7 The detection of transformation efficiency of *B. velezensis* DMW1, *B. velezensis* FZB42 and *B. subtilis* 168. Data were analyzed by a one-way ANOVA, followed by Duncan's multiple range test. Different lowercase letter represented statistically significant differences ( $\alpha=0.05$ )

TABLE S1 *In vitro* antagonistic activity of *B. velezensis* DMW1 and FZB42 against fungi, oomycetes and bacteria pathogens

| Pathogen                           | Width of inhibition zone (cm) |           | Inhibition rate (%) |        |
|------------------------------------|-------------------------------|-----------|---------------------|--------|
|                                    | DMW1                          | FZB42     | DMW1                | FZB42  |
| <b>Fungi</b>                       |                               |           |                     |        |
| <i>B. cinerea</i>                  | 2.90±0.06                     | 2.90±0.10 | 70.15%              | 70.13% |
| <i>S. sclerotiorum</i>             | 2.63±0.09                     | 2.50±0.06 | 64.73               | 61.46% |
| <i>R. solani</i>                   | 2.63±0.03                     | 2.37±0.07 | 64.22%              | 57.40% |
| <i>F. graminearum</i>              | 2.63±0.07                     | 2.43±0.03 | 65.83%              | 61.16% |
| <i>F. verticillioides</i>          | 2.47±0.09                     | 2.48±0.12 | 66.06%              | 65.88% |
| <i>G. graminis</i>                 | 2.47±0.03                     | 2.47±0.03 | 60.17%              | 60.17% |
| <i>P. oryzae</i>                   | 1.07±0.07                     | 1.07±0.07 | 30.72%              | 30.72% |
| <b>Oomycetes</b>                   |                               |           |                     |        |
| <i>P. capsici</i>                  | 2.23±0.09                     | 2.17±0.03 | 63.18%              | 60.56% |
| <i>P. sojae</i>                    | 1.70±0.06                     | 1.73±0.15 | 48.09%              | 48.09% |
| <b>Bacteria</b>                    |                               |           |                     |        |
| <i>X. oryzae</i> pv. <i>oryzae</i> | 1.77±0.03                     | 1.63±0.03 | /                   | /      |
| <i>P. ananatis</i>                 | 1.00±0.00                     | 0.87±0.03 | /                   | /      |
| <i>R. solanacearum</i>             | 2.30±0.12                     | 2.50±0.06 | /                   | /      |

TABLE S2 Genes associated with plant growth promotion in DMW1 genome

| Gene        | From      | To        | Product                              | Function                       |
|-------------|-----------|-----------|--------------------------------------|--------------------------------|
| <i>nasD</i> | 356,481   | 358,898   | Nitrite reductase                    |                                |
| <i>nasE</i> | 356,140   | 356,460   | Nitrite reductase small subunit      |                                |
| <i>narG</i> | 3,664,696 | 3,668,382 | Nitrate reductase, alpha subunit     | Nitrogen fixation              |
| <i>narH</i> | 3,663,243 | 3,664,706 | Nitrate reductase beta subunit       |                                |
| <i>nasA</i> | 363,654   | 364,859   | Nitrate transporter                  |                                |
| <i>narK</i> | 3,670,743 | 3,671,873 |                                      |                                |
| <i>dkgB</i> | 206,534   | 205,689   | 2,5-diketo-D-gluconic acid reductase | Phosphorus solubilization      |
| <i>speA</i> | 1,482,099 | 1,483,571 | Arginine decarboxylase               |                                |
| <i>speE</i> | 3,679,474 | 3,680,304 | Spermidine synthase                  | Spermidine                     |
| <i>speH</i> | 2,810,449 | 2,810,835 | S-adenosylmethionine decarboxylase   | synthesis                      |
| <i>bldD</i> | 600,115   | 600,573   | Spermidine acetyltransferase         |                                |
| <i>ysnE</i> | 3,744,768 | 3,745,268 | N-acetyltransferase                  | Indole-3-acetic acid synthesis |
| <i>dhaS</i> | 2,052,357 | 2,053,844 | aldehyde dehydrogenase               |                                |
| <i>yhcX</i> | 937,495   | 939,033   | Nitrilase cyanide hydratase          |                                |
| <i>ilvH</i> | 2,732,268 | 2,732,786 | Acetolactate synthase small subunit  | 3-hydroxy-2-butanone           |
| <i>ilvB</i> | 2,732,783 | 2,734,600 | Acetolactate synthase large subunit  |                                |
| <i>alsD</i> | 3,551,453 | 3,552,220 | Acetolactate decarboxylase           | synthesis                      |
| <i>alsS</i> | 3,552,281 | 3,553,996 | Acetolactate synthase                |                                |
| <i>bdhA</i> | 653,815   | 654,855   | Butanediol dehydrogenase             | 2, 3-butanediol synthesis      |
| <i>dhbF</i> | 3,081,520 | 3,088,647 | Non-ribosomal peptide synthetase     | Siderophore (bacillibactin)    |
| <i>dhbB</i> | 3,088,662 | 3,089,588 | Isochorismatase                      |                                |
| <i>dhbE</i> | 3,089,606 | 3,091,231 | 2,3-dihydroxybenzoate-AMP ligase     | synthesis                      |
| <i>dhbA</i> | 3,092,470 | 3,093,255 | Dehydrogenase reductase              |                                |

TABLE S3 Strains and plasmids used in this study

| Strains and plasmids               | Relevant characteristics                                                         | Source     |
|------------------------------------|----------------------------------------------------------------------------------|------------|
| <b>Strains</b>                     |                                                                                  |            |
| DMW1                               | The wild type of <i>B. velezensis</i>                                            | This study |
| FZB42                              | The wild type of <i>B. velezensis</i>                                            | (1)        |
| CJ1                                | DMW1 $\Delta$ srf, deficient in surfactin synthesis                              | This study |
| CJ3                                | DMW1 $\Delta$ itu, deficient in iturin synthesis                                 | This study |
| CJ12                               | DMW1 $\Delta$ srf fen, deficient in surfactin and fengycin synthesis             | This study |
| CJ5                                | DMW1 $\Delta$ srf fen itu, deficient in surfactin, fengycin and iturin synthesis | This study |
| CJ6                                | DMW1 $\Delta$ mln, deficient in marcolactin synthesis                            | This study |
| CJ7                                | DMW1 $\Delta$ dfn, deficient in difficidin synthesis                             | This study |
| CJ8                                | DMW1 $\Delta$ bae, deficient in bacillaene synthesis                             | This study |
| CJ9                                | DMW1 $\Delta$ bac, deficient in bacilysin synthesis                              | This study |
| <i>B. cinerea</i>                  |                                                                                  | This lab   |
| <i>S. sclerotiorum</i>             |                                                                                  | This lab   |
| <i>R. solani</i>                   |                                                                                  | This lab   |
| <i>F. graminearum</i> PH-1         | Phytopathogenic fungi                                                            | This lab   |
| <i>F. verticillioides</i> 7600     |                                                                                  | This lab   |
| <i>G. graminis</i>                 |                                                                                  | This lab   |
| <i>P. oryzae</i>                   |                                                                                  | This lab   |
| <i>P. capsica</i>                  |                                                                                  | This lab   |
| <i>P. sojae</i> P6497              | Phytopathogenic oomycetes                                                        | (2)        |
| <i>X. oryzae</i> pv. <i>oryzae</i> |                                                                                  | (3)        |
| PXO99 <sup>A</sup>                 |                                                                                  |            |
| <i>P. ananatis</i> DZ-12           | Phytopathogenic bacteria                                                         | This lab   |
| <i>R. solanacearum</i>             |                                                                                  | This lab   |
| <b>plasmids</b>                    |                                                                                  |            |
| pJOE8999                           | Wild type vector for CRISPR/Cas9 genome editing                                  | (4)        |
| pAD 43-25                          | GFP-plasmid for the detection of transformation efficiency.                      | This lab   |
| pJOE $\Delta$ srf                  | Knock-out vector for gene of surfactin synthesis                                 | This study |
| pJOE $\Delta$ itu                  | Knock-out vector for gene of iturin synthesis                                    | This study |
| pJOE $\Delta$ fen                  | Knock-out vector for gene of fengycin synthesis                                  | This study |
| pJOE $\Delta$ mln                  | Knock-out vector for gene of marcolactin synthesis                               | This study |
| pJOE $\Delta$ dfn                  | Knock-out vector for gene of difficidin synthesis                                | This study |
| pJOE $\Delta$ bae                  | Knock-out vector for gene of bacillaene synthesis                                | This study |
| pJOE $\Delta$ bac                  | Knock-out vector for gene of bacilysin synthesis                                 | This study |



TABLE S4 Primers used in this study

| Primer name | Sequence (5' to 3')                                    | Purpose                           |
|-------------|--------------------------------------------------------|-----------------------------------|
| sg-srf-F    | tacgagaaacgctttaccgcacag                               |                                   |
| sg-srf-R    | aaacctgtgcggtaaagcgttct                                |                                   |
| srfL-F      | cactatagggtcgacggccaacgaggcctgatatggaggacgtccatgttt    | Construction of pJOE $\Delta$ srf |
| srfL-R      | taatgcgcgagccatgtagctacatgcttgacc                      |                                   |
| srfR-F      | actacatggctcgcgcatataaaaagagctc                        |                                   |
| srfR-R      | ttctaatctagaaaagccttattggcccgggcttctctttctatcg         |                                   |
| sg-fen-F    | tacgtcgggaactgaacaaatcg                                |                                   |
| sg-fen-R    | aaaccgattgtttcagttcccga                                |                                   |
| fenL-F      | cactatagggtcgacggccaacgaggccttgatcatgaagatcaatacgaattt | Construction of pJOE $\Delta$ fen |
| fenL-R      | tgagatcttagcaagcctgatctccggtt                          |                                   |
| fenR-F      | caggcttgctaagatctgcagacagcttatcagc                     |                                   |
| fenR-R      | ttctaatctagaaaagccttattggcctgaagaactcgattgcccc         |                                   |
| sg-itu-F    | tacggactccgtctcattaccggg                               |                                   |
| sg-itu-R    | aaaccgggtaatgagacggagtc                                |                                   |
| ituL-F      | cactatagggtcgacggccaacgaggccgcatcaaatgttttacggcc       | Construction of pJOE $\Delta$ itu |
| ituL-R      | agggtattggagatcgcacgaacgggttaa                         |                                   |
| ituR-F      | ggatcgatctccaataccctctggcaacacc                        |                                   |
| ituR-R      | ttctaatctagaaaagccttattggccgctggaattttggctgtctga       |                                   |
| sg-bae-F    | tacggccgtgaatgaacagacgg                                |                                   |
| sg-bae-R    | aaaccgctctgtttcattcacggc                               |                                   |
| baeL-F      | cactatagggtcgacggccaacgaggcctgggacttatcttccatgcgtt     | Construction of pJOE $\Delta$ bae |
| baeL-R      | atgcggcaattctctgcagaagccgtgtct                         |                                   |
| baeR-F      | tctgcagagaattgcccatcccgttcga                           |                                   |
| baeR-R      | ttctaatctagaaaagccttattggccatgccgatgatcatcaggg         |                                   |
| sg-mln-F    | tacgggacagaaaagattaatcag                               |                                   |
| sg-mln-R    | aaacctgattaatctttctgtcc                                |                                   |
| mlnL-F      | cactatagggtcgacggccaacgaggcccagcttattgaagcccacgg       | Construction of pJOE $\Delta$ mln |
| mlnL-R      | atatacccgttgctcctgataccaaaatt                          |                                   |
| mlnR-F      | caggaggcaacgggatatacagaaccgctga                        |                                   |
| mlnR-R      | ttctaatctagaaaagccttattggccgcttctcagaaaagctctgacc      |                                   |
| sg-dfn-F    | tacgggagatatacggaaaacag                                |                                   |
| sg-dfn-R    | aaacctgttttccgtatatctcc                                |                                   |
| dfnL-F      | cactatagggtcgacggccaacgaggcccagtgatcgcgaccaatgtg       | Construction of pJOE $\Delta$ dfn |
| dfnL-R      | ctttcagcttgctcggaaatctcagcgtttt                        |                                   |
| dfnR-F      | gattccgagcaagctgaaaggatggatccgc                        |                                   |
| dfnR-R      | ttctaatctagaaaagccttattggccgaaggggcaatcctcttatgttt     |                                   |
| sg-bac-F    | tacgcgaagcgttcaacagcattg                               |                                   |
| sg-bac-R    | aaaccaatgctgttgaacgcttcg                               |                                   |
| bacL-F      | cactatagggtcgacggccaacgaggcccagtgatcgcgaccaatgtg       | Construction of pJOE $\Delta$ bac |
| bacL-R      | ctttcagcttgctcggaaatctcagcgtttt                        |                                   |
| bacR-F      | gattccgagcaagctgaaaggatggatccgc                        |                                   |
| bacR-R      | ttctaatctagaaaagccttattggccgaaggggcaatcctcttatgttt     |                                   |

---

|         |                      |              |
|---------|----------------------|--------------|
| KOsrF-F | athtaacggcttgctcaagc |              |
| KOsrF-R | gctgtcaaaatcctcaacg  |              |
| KOfen-F | aaaccgttcgattgaagcga |              |
| KOfen-R | atccagaagcgaatgaaca  |              |
| KOitu-F | gaataaaggattgaggcttg |              |
| KOitu-R | gttacggacaaaaggcgtac | Verification |
| KObae-F | accgagcgaatccatttga  | of the knock |
| KObae-R | gaaatcctgctgctggcgat | out of each  |
| KOmln-F | gtgtacgcagtcattaaagg | gene         |
| KOmln-R | aattgagatcctcttcacgc |              |
| KOdfn-F | tgaagcgcatattgccgaat |              |
| KOdfn-R | gtcgtttccattccgtttct |              |
| KObac-F | cggcacagcttatttctgcg |              |
| KObac-R | aatccggccctgaatctggt |              |

---

## Reference

1. Koumoutsi A, Chen XH, Henne A, Liesegang H, Hitzeroth G, Franke P, Vater J, Borriss R. 2004. Structural and functional characterization of gene clusters directing nonribosomal synthesis of bioactive cyclic lipopeptides in *Bacillus amyloliquefaciens* strain FZB42. *Journal of Bacteriology* 186:1084-1096.
2. Connolly MS, Williams N, Heckman CA, Morris PF. 1999. Soybean isoflavones trigger a calcium influx in *Phytophthora sojae*. *Fungal Genetics and Biology* 28:6-11.
3. Hopkins CM, White FF, Choi SH, Guo A, Leach JE. 1992. Identification of a family of avirulence genes from *Xanthomonas-oryzae* pv *oryzae*. *Molecular Plant-Microbe Interactions* 5:451-459.
4. Altenbuchner J. 2016. Editing of the *Bacillus subtilis* genome by the CRISPR-Cas9 system. *Applied and Environmental Microbiology* 82:5421-5427.
